# Supplementary material for: On the design and prospects of direct RNA sequencing
Source: Oxford University Press journal article supplement (doi:10.1093/bfgp/elw043), 2017-02-17
Supplement: 2016_direct_rna-seq-design-v4_supplement_elw043.pdf [file 2016_direct_rna-seq-design-v4_supplement_elw043.pdf]

# Supplementary Materials

## Supplementary Methods

Except where otherwise indicated all analyses were carried out using custom-written Python scripts.

### Short-read RNA-seq data analysis

The BAM file for the K562 Caltech PolyA+ Rep1 RNA-seq dataset was downloaded from <http://hgdownload-test.cse.ucsc.edu/goldenPath/hg19/encodeDCC/>. The indicated number of mapped sequencing fragments were randomly subsampled from the BAM files. Subsequently, gene expression values were calculated for each number of fragments using Cufflinks [1] (version 2.0.2). For a given gene  $g$ , each subsampled value  $\text{FPKM}_{g,ss}$  was considered within 10% of its final value  $\text{FPKM}_g$  if  $|\text{FPKM}_{g,ss} - \text{FPKM}_g|/\text{FPKM}_g \leq 0.1$ .

### Direct RNA-seq simulation

The simulation of direct RNA-seq quantifications was carried out as follows. Without loss of generality, the FPKM values from Cufflinks quantifications were used as a starting point, i.e. the relative average transcripts abundances per cell were taken to be the relative abundances of genes in the set of FPKM values. Thus,  $\text{TPM}_g = (\text{FPKM}_g / \sum_{g \in G} \text{FPKM}_g) \cdot 10^6$ . The expected number of original transcripts for each gene/isoform was then calculated from the number of cells  $N$  and the number of transcripts per cell  $T_{\text{cell}}$ :  $T_g = \text{TPM}_g \cdot N \cdot T_{\text{cell}} \cdot 10^{-6}$ . The number was stochastically rounded to the next higher integer with a probability  $p = T - \lfloor T \rfloor$ .

Finally, the sequencing process was simulated as described above, with each transcript successfully passing the library conversion or sequencing steps with probabilities  $p_{\text{lib}}$  and  $p_{\text{seq}}$ , respectively, the product of which is the total single molecule capture probability  $p_{\text{smc}}$ .

Formally we have:

---

#### Algorithm 1 Direct RNA-seq simulation

---

```
for  $g \in G$  do
   $\text{TPM}_g \leftarrow (\text{FPKM}_g / \sum_{g \in G} \text{FPKM}_g) \cdot 10^6$ 
   $|T_g|_{\text{original}} \leftarrow \text{TPM}_g \cdot T_{\text{cell}} \cdot N \cdot 10^{-6}$ 
   $p \leftarrow$  random number  $\in [0, 1]$ 
  if  $p \leq T - \lfloor T \rfloor$  then
     $T = \lfloor T \rfloor$ 
  else
     $T = \lfloor T \rfloor$ 
  end if
   $|T_g|_{\text{library}} \leftarrow 0$ 
   $i \leftarrow 0$ 
  while  $i \leq |T_g|_{\text{original}}$  do
     $i \leftarrow i + 1$ 
     $p \leftarrow$  random number  $\in [0, 1]$ 
```

```
    if  $p \leq p_{\text{lib}}$  then
       $|T_g|_{\text{library}} \leftarrow |T_g|_{\text{library}} + 1$ 
    end if
  end while
   $|T_g|_{\text{sequenceable}} \leftarrow 0$ 
   $i \leftarrow 0$ 
  while  $i \leq |T_g|_{\text{library}}$  do
     $i \leftarrow i + 1$ 
     $p \leftarrow$  random number  $\in [0, 1]$ 
    if  $p \leq p_{\text{seq}}$  then
       $|T_g|_{\text{sequenceable}} \leftarrow |T_g|_{\text{sequenceable}} + 1$ 
    end if
  end while
end for
if  $R > \sum_{g \in G} |T_g|_{\text{sequenceable}}$  then
   $p_{\text{sampling}} \leftarrow R / \sum_{g \in G} |T_g|_{\text{sequenceable}}$ 
else
   $p_{\text{sampling}} \leftarrow 1$ 
end if
for  $g \in G$  do
   $|R_g| \leftarrow 0$ 
   $i \leftarrow 0$ 
  while  $i \leq |T_g|_{\text{sequenceable}}$  do
     $i \leftarrow i + 1$ 
     $p \leftarrow$  random number  $\in [0, 1]$ 
    if  $p \leq p_{\text{sampling}}$  then
       $|R_g| \leftarrow |R_g| + 1$ 
    end if
  end while
end for
```

---

Where:

- $\text{FPKM}_g$ : FPKM values for each gene  $g$  in the set of all genes  $G$
- $N$ : number of cells
- $T_{\text{cell}}$ : average number of transcripts per cell
- $p_{\text{lib}}$ : probability of successful library conversion for any given individual RNA molecule
- $p_{\text{seq}}$ : probability of successful sequencing for any given RNA molecule successfully converted into the library
- $R$ : the number of sequencing reads

TPM values were calculated for each gene/isoform based on the abundances of transcripts in the resulting dataset. As before, the fraction of genes/transcripts for each  $|\text{TPM}_{g,ss} - \text{TPM}_g|/\text{TPM}_g \leq 0.1$  was plotted.

## Supplementary Figures

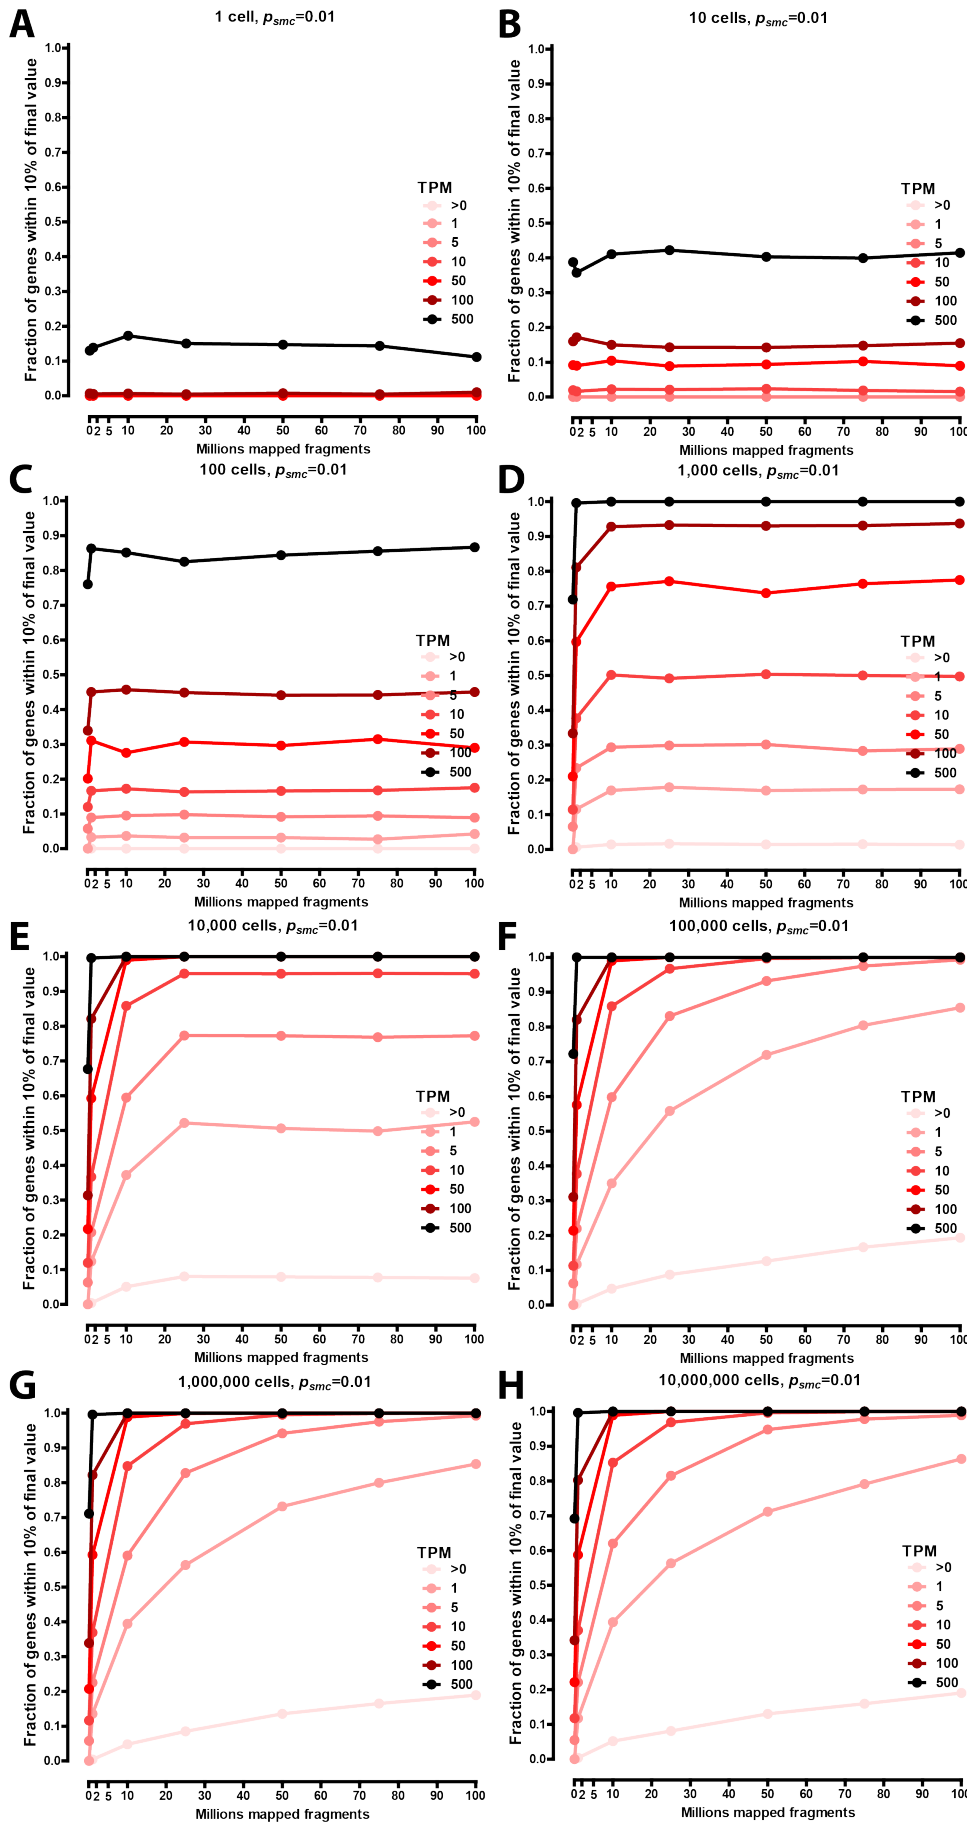

**Supplementary Figure 1: Accuracy of direct RNA-seq quantification at the gene level as a function of input cell number at  $p_{smc} = 0.01$ .** Gene expression in human K562 cells was simulated using the GENCODE V16 annotation as described in the Methods section. (A) 1 cell; (B) 10 cells; (C) 100 cells; (D) 1000 cells; (E) 10,000 cells; (F) 100,000 cells; (G) 1,000,000 cells; (H) 10,000,000 cells. Note that because of the absence of amplification, the total number of reads cannot be higher than  $\sim T_{cell} \times N \times p_{smc}$  (the number of transcripts per cell times the number of cells times the probability of capture and sequencing), a value exceeded for a number of the conditions simulated. Also note that a slightly different original transcriptome and a different sequencing process were simulated for each sequencing run, which introduces some stochasticity in the curves at low cell numbers.

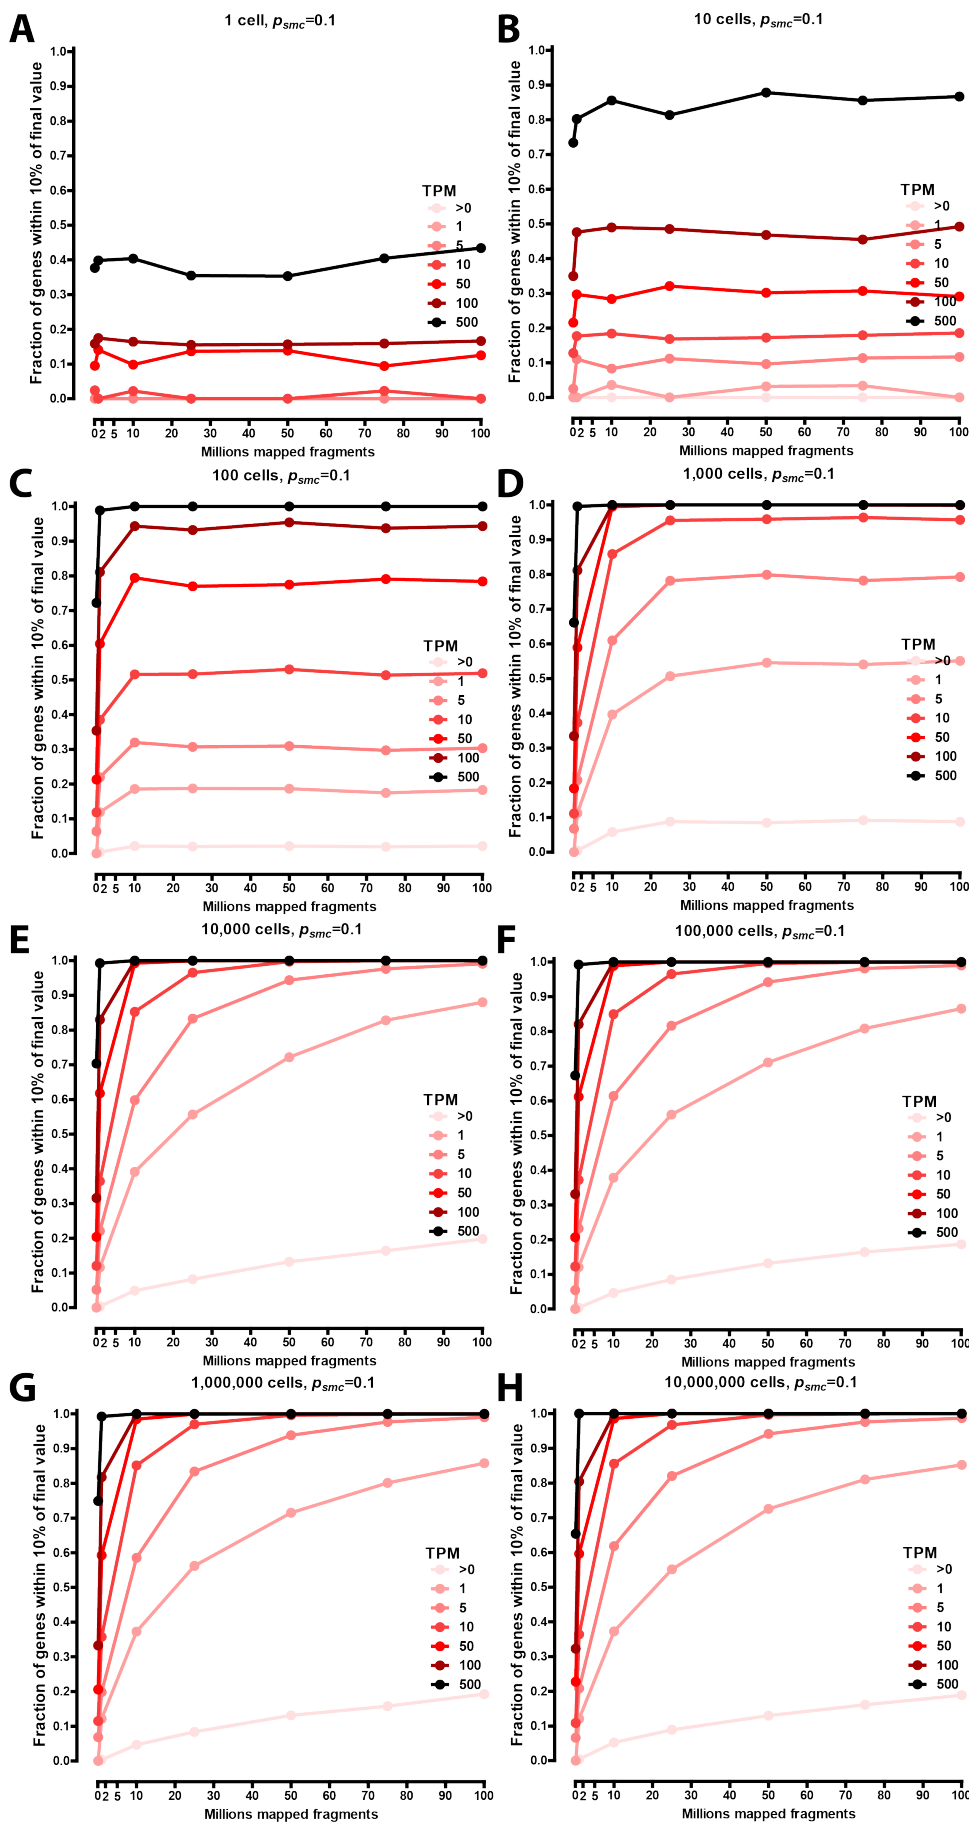

**Supplementary Figure 2: Accuracy of direct RNA-seq quantification at the gene level as a function of input cell number at  $p_{smc} = 0.1$ .** Gene expression in human K562 cells was simulated using the GENCODE V16 annotation as described in the Methods section. (A) 1 cell; (B) 10 cells; (C) 100 cells; (D) 1000 cells; (E) 10,000 cells; (F) 100,000 cells; (G) 1,000,000 cells; (H) 10,000,000 cells. Note that because of the absence of amplification, the total number of reads cannot be higher than  $\sim T_{cell} \times N \times p_{smc}$  (the number of transcripts per cell times the number of cells times the probability of capture and sequencing), a value exceeded for a number of the conditions simulated. Also note that a slightly different original transcriptome and a different sequencing process were simulated for each sequencing run, which introduces some stochasticity in the curves at low cell numbers.

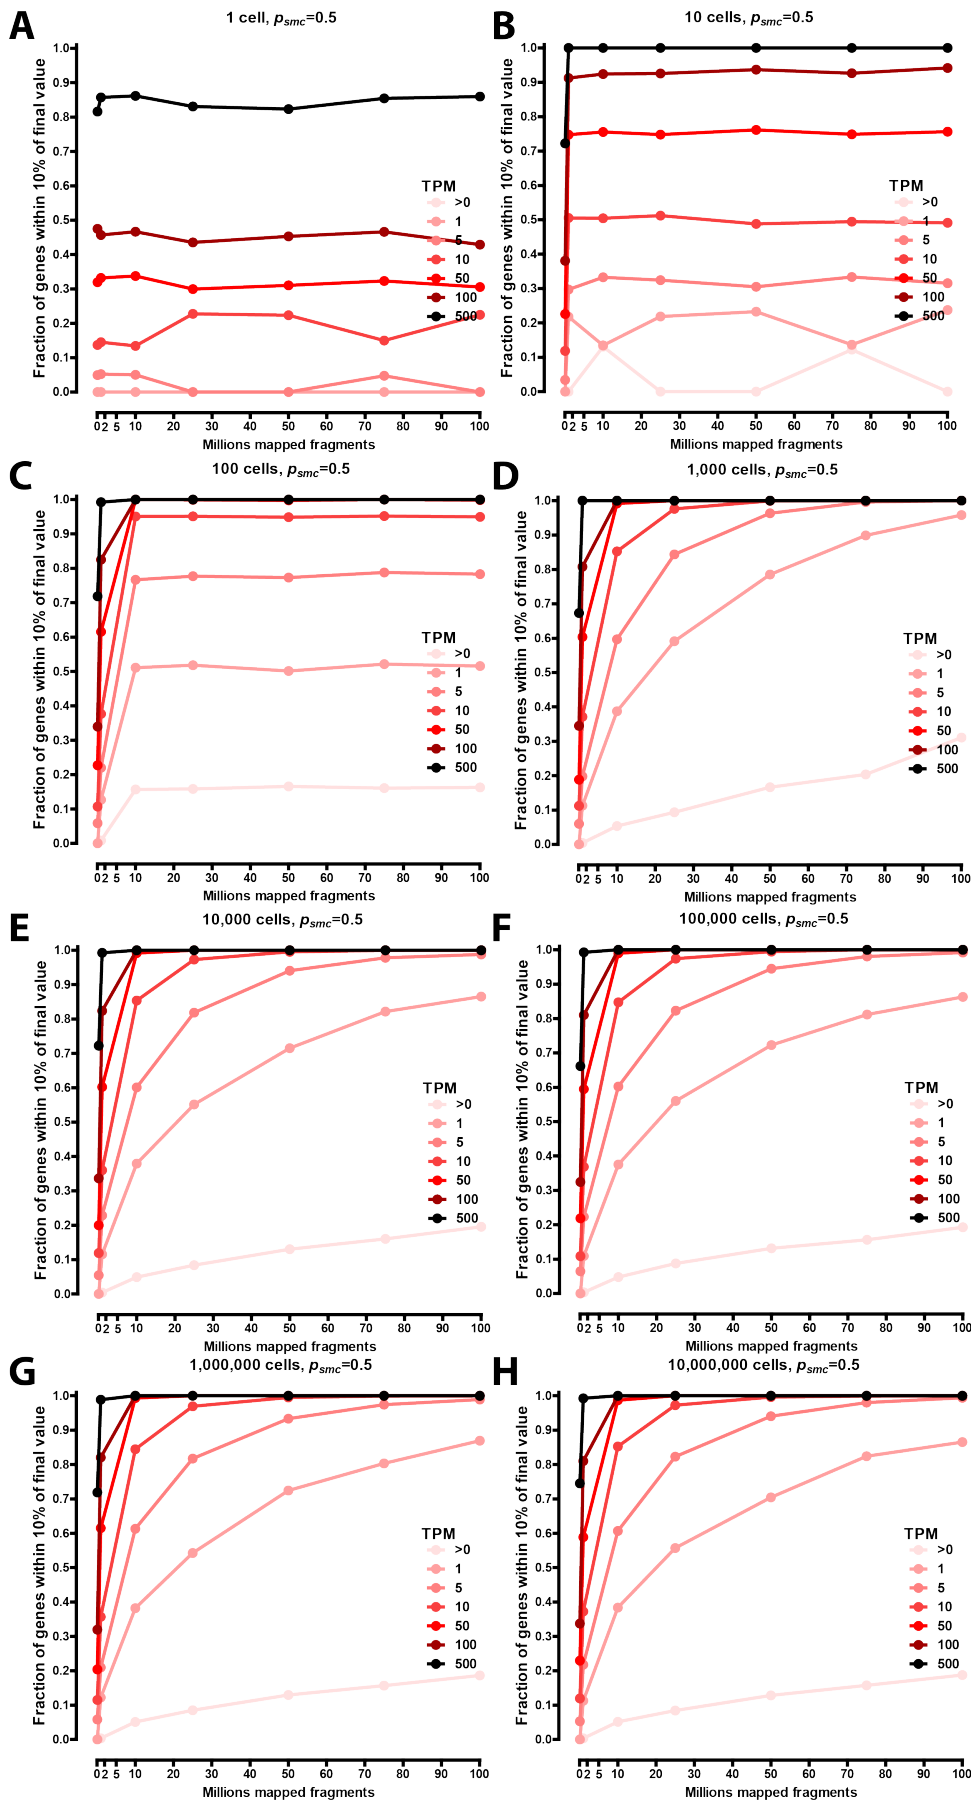

**Supplementary Figure 3: Accuracy of direct RNA-seq quantification at the gene level as a function of input cell number at  $p_{smc} = 0.5$ .** Gene expression in human K562 cells was simulated using the GENCODE V16 annotation as described in the Methods section. (A) 1 cell; (B) 10 cells; (C) 100 cells; (D) 1000 cells; (E) 10,000 cells; (F) 100,000 cells; (G) 1,000,000 cells; (H) 10,000,000 cells. Note that because of the absence of amplification, the total number of reads cannot be higher than  $\sim T_{cell} \times N \times p_{smc}$  (the number of transcripts per cell times the number of cells times the probability of capture and sequencing), a value exceeded for a number of the conditions simulated. Also note that a slightly different original transcriptome and a different sequencing process were simulated for each sequencing run, which introduces some stochasticity in the curves at low cell numbers.

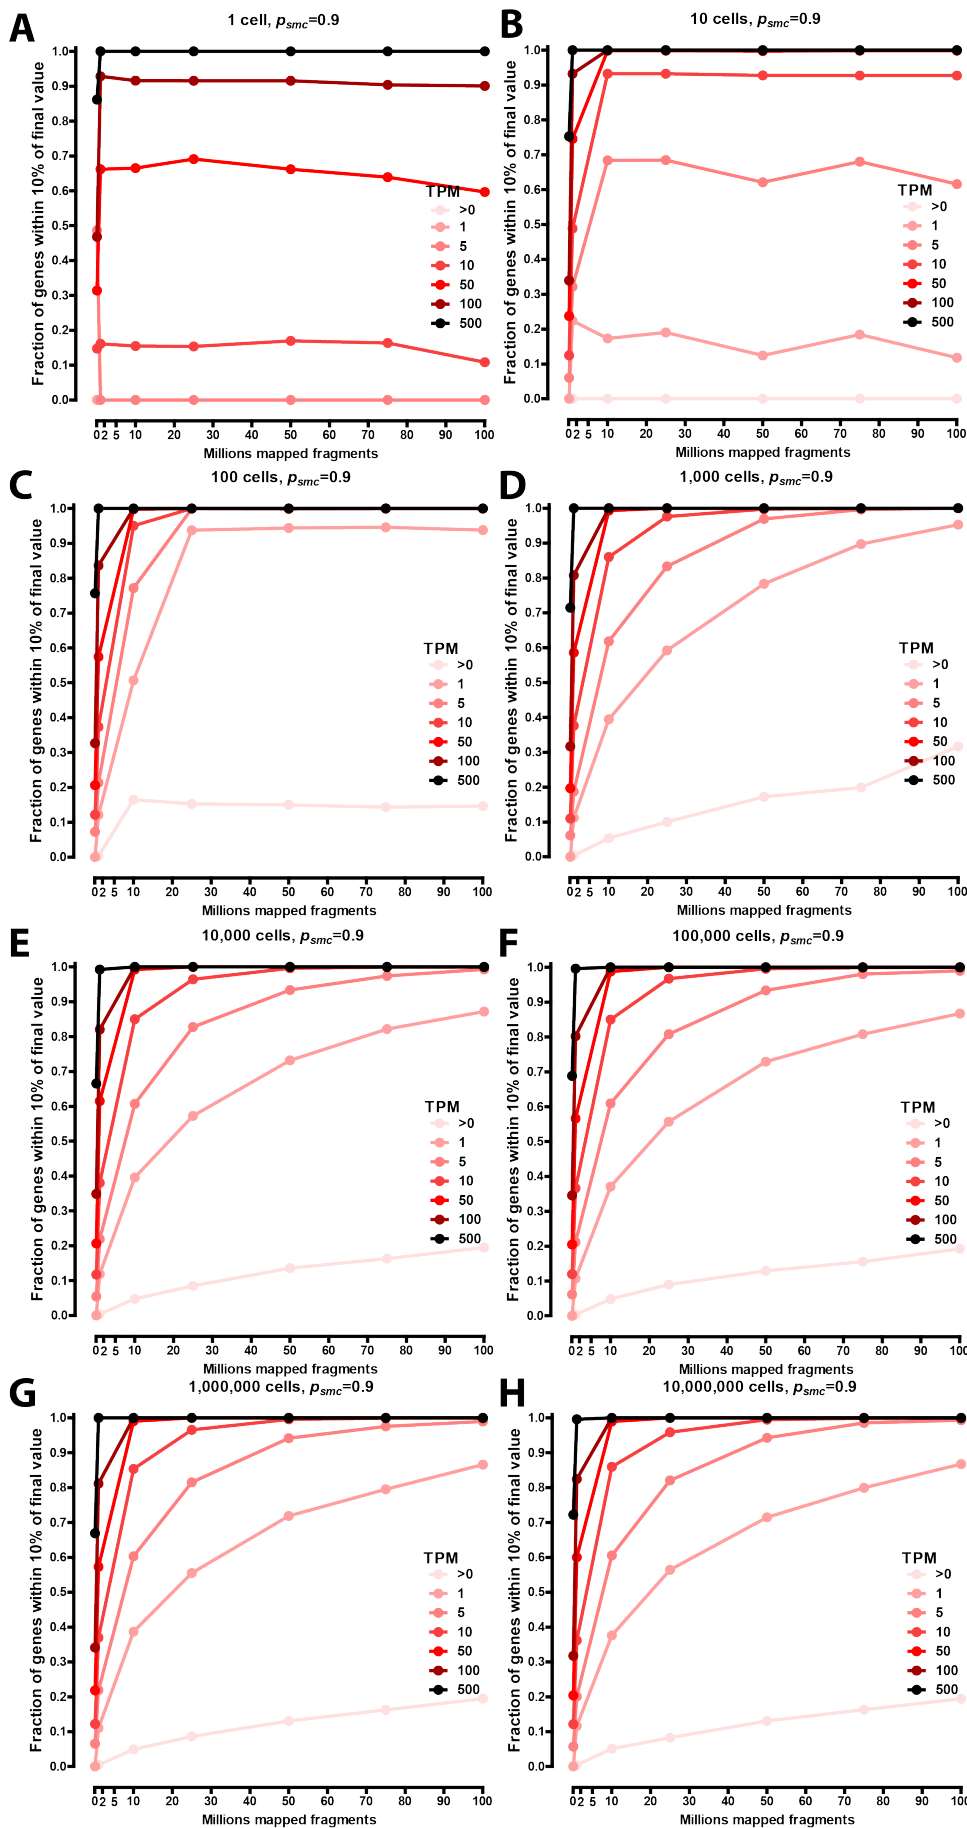

Supplementary Figure 4: Accuracy of direct RNA-seq quantification at the gene level as a function of input cell number at  $p_{smc} = 0.9$ . Gene expression in human K562 cells was simulated using the GENCODE V16 annotation as described in the Methods section. (A) 1 cell; (B) 10 cells; (C) 100 cells; (D) 1000 cells; (E) 10,000 cells; (F) 100,000 cells; (G) 1,000,000 cells; (H) 10,000,000 cells. Note that because of the absence of amplification, the total number of reads cannot be higher than  $\sim T_{cell} \times N \times p_{smc}$  (the number of transcripts per cell times the number of cells times the probability of capture and sequencing), a value exceeded for a number of the conditions simulated. Also note that a slightly different original transcriptome and a different sequencing process were simulated for each sequencing run, which introduces some stochasticity in the curves at low cell numbers.

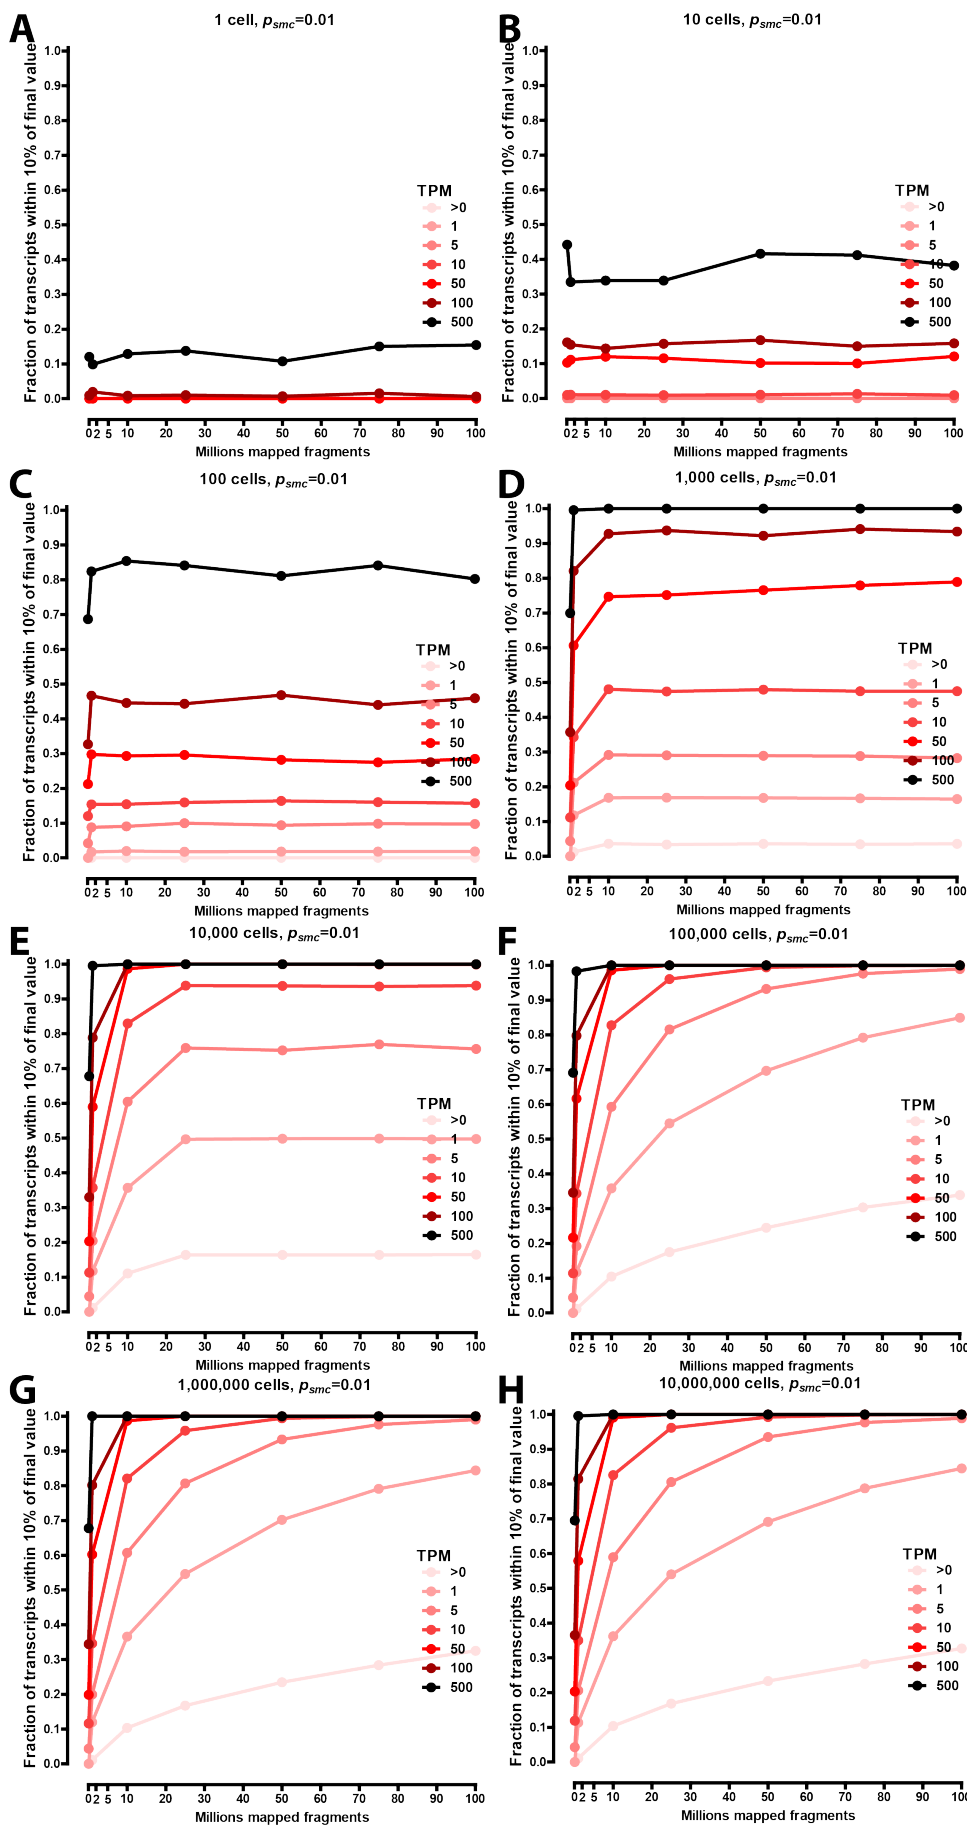

**Supplementary Figure 5: Accuracy of direct RNA-seq quantification at the transcript level as a function of input cell number at  $p_{smc} = 0.01$ .** Gene expression in human K562 cells was simulated using the GENCODE V16 annotation as described in the Methods section. (A) 1 cell; (B) 10 cells; (C) 100 cells; (D) 1000 cells; (E) 10,000 cells; (F) 100,000 cells; (G) 1,000,000 cells; (H) 10,000,000 cells. Note that because of the absence of amplification, the total number of reads cannot be higher than  $\sim T_{cell} \times N \times p_{smc}$  (the number of transcripts per cell times the number of cells times the probability of capture and sequencing), a value exceeded for a number of the conditions simulated. Also note that a slightly different original transcriptome and a different sequencing process were simulated for each sequencing run, which introduces some stochasticity in the curves at low cell numbers.

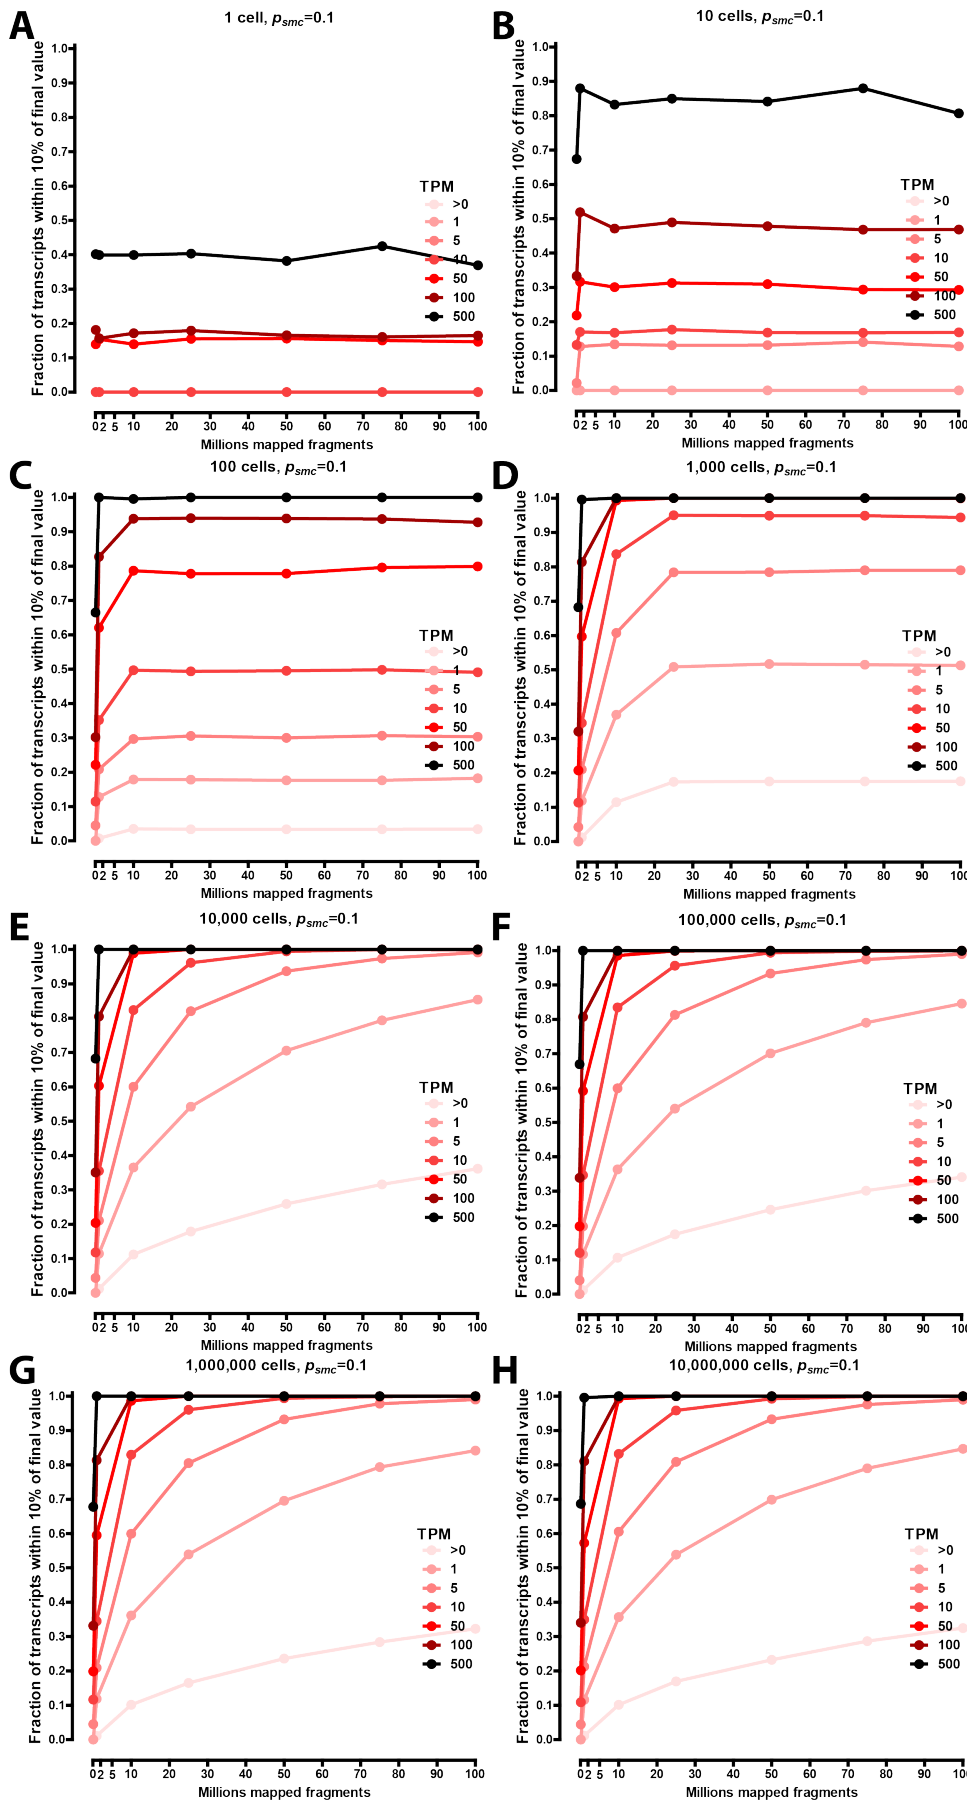

**Supplementary Figure 6: Accuracy of direct RNA-seq quantification at the transcript level as a function of input cell number at  $p_{smc} = 0.1$ .** Gene expression in human K562 cells was simulated using the GENCODE V16 annotation as described in the Methods section. (A) 1 cell; (B) 10 cells; (C) 100 cells; (D) 1000 cells; (E) 10,000 cells; (F) 100,000 cells; (G) 1,000,000 cells; (H) 10,000,000 cells. Note that because of the absence of amplification, the total number of reads cannot be higher than  $\sim T_{cell} \times N \times p_{smc}$  (the number of transcripts per cell times the number of cells times the probability of capture and sequencing), a value exceeded for a number of the conditions simulated. Also note that a slightly different original transcriptome and a different sequencing process were simulated for each sequencing run, which introduces some stochasticity in the curves at low cell numbers.



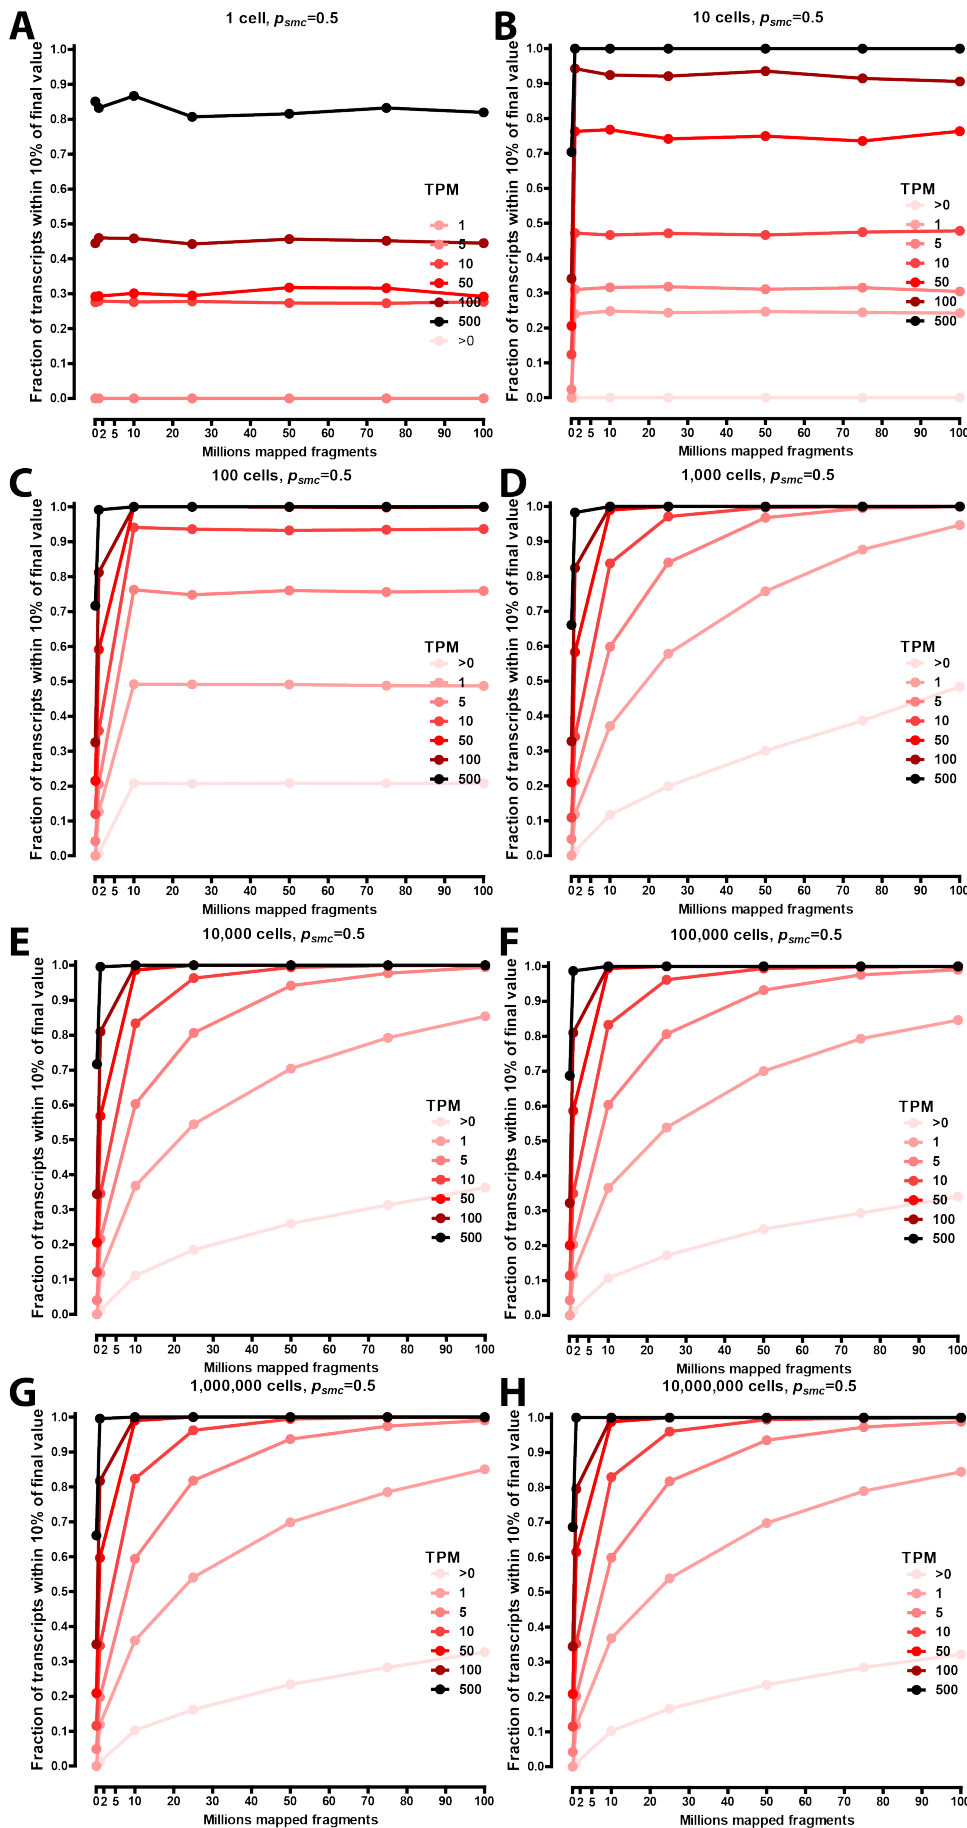

Supplementary Figure 7: Accuracy of direct RNA-seq quantification at the transcript level as a function of input cell number at  $p_{smc} = 0.5$ . Gene expression in human K562 cells was simulated using the GENCODE V16 annotation as described in the Methods section. (A) 1 cell; (B) 10 cells; (C) 100 cells; (D) 1000 cells; (E) 10,000 cells; (F) 100,000 cells; (G) 1,000,000 cells; (H) 10,000,000 cells. Note that because of the absence of amplification, the total number of reads cannot be higher than  $\sim T_{cell} \times N \times p_{smc}$  (the number of transcripts per cell times the number of cells times the probability of capture and sequencing), a value exceeded for a number of the conditions simulated. Also note that a slightly different original transcriptome and a different sequencing process were simulated for each sequencing run, which introduces some stochasticity in the curves at low cell numbers.



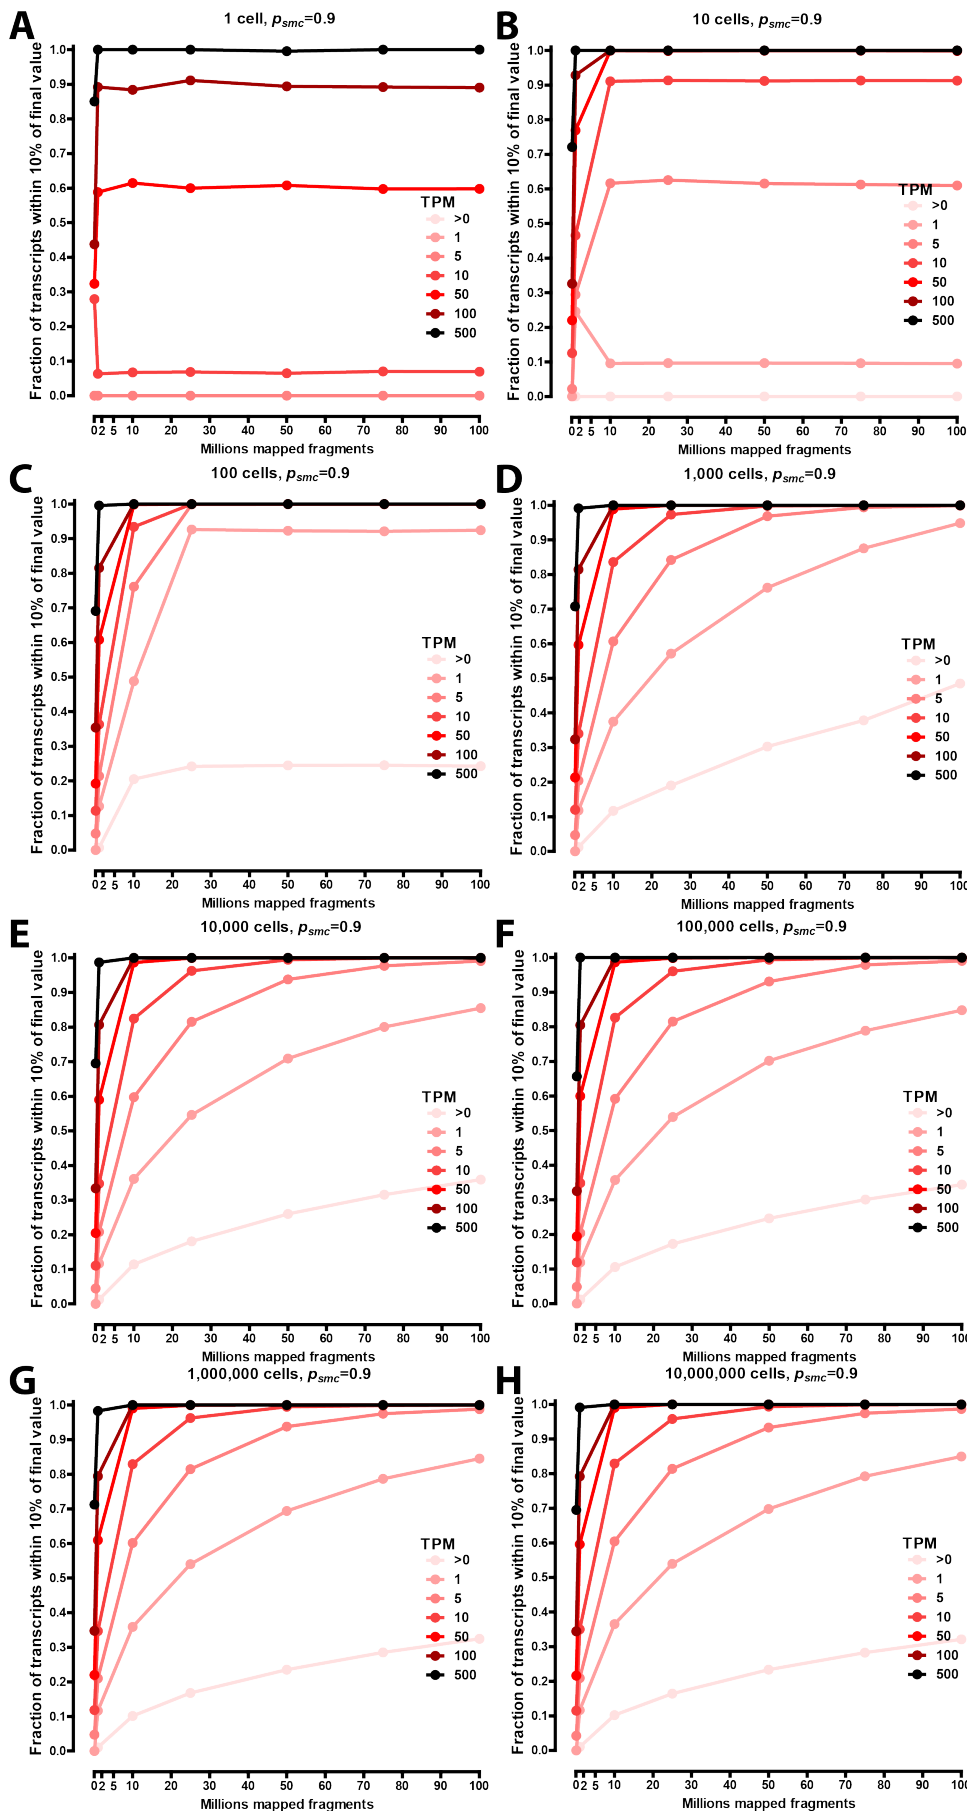

**Supplementary Figure 8: Accuracy of direct RNA-seq quantification at the transcript level as a function of input cell number at  $p_{smc} = 0.9$ .** Gene expression in human K562 cells was simulated using the GENCODE V16 annotation as described in the Methods section. (A) 1 cell; (B) 10 cells; (C) 100 cells; (D) 1000 cells; (E) 10,000 cells; (F) 100,000 cells; (G) 1,000,000 cells; (H) 10,000,000 cells. Note that because of the absence of amplification, the total number of reads cannot be higher than  $\sim T_{cell} \times N \times p_{smc}$  (the number of transcripts per cell times the number of cells times the probability of capture and sequencing), a value exceeded for a number of the conditions simulated. Also note that a slightly different original transcriptome and a different sequencing process were simulated for each sequencing run, which introduces some stochasticity in the curves at low cell numbers.

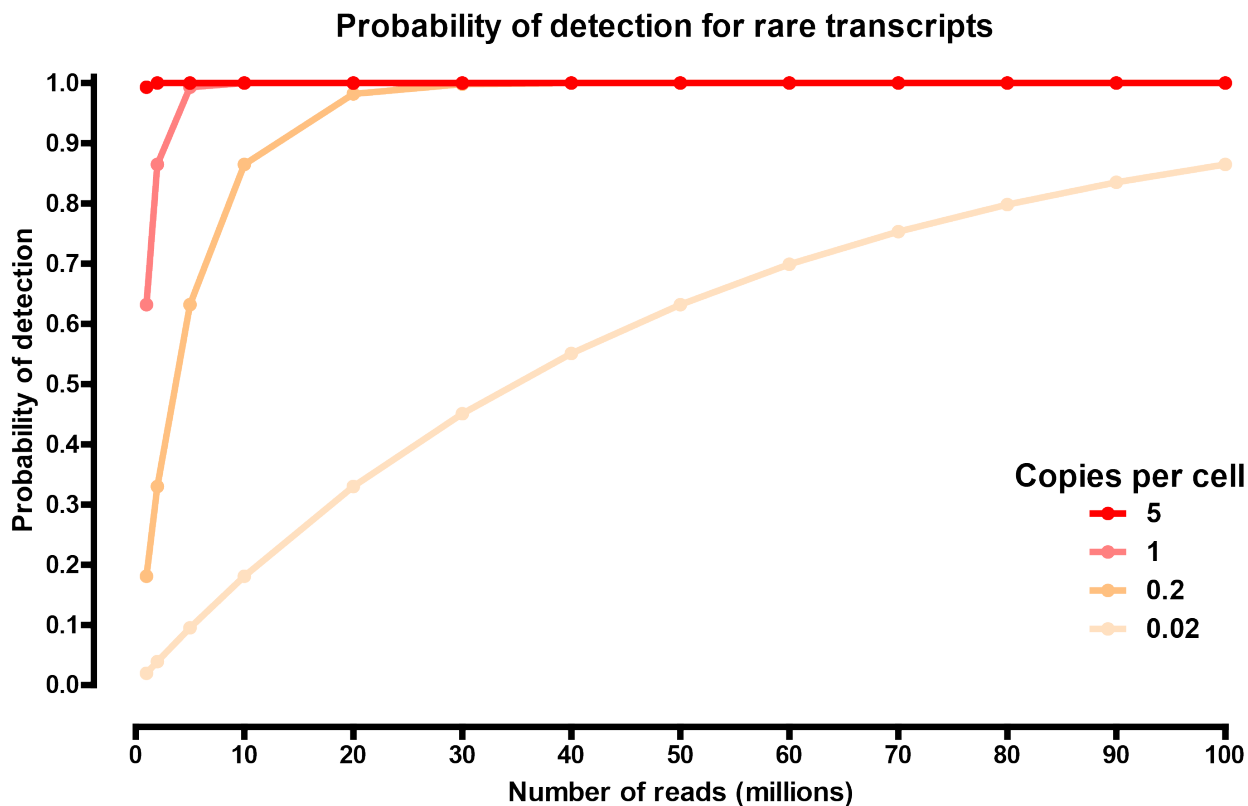

**Supplementary Figure 9: Detection of rare transcripts as a function of the sequencing depth of direct RNA-seq.** The probability of detection given sufficiently many input cells and a sufficiently high  $p_{smc}$  is given by  $1 - (1 - C_c/T_{all})^R$ , where  $R$  is the number of reads,  $C_c$  is the average number of copies per cell for the transcript of interest, and  $T_{all}$  is the total number of transcripts (coding and non-coding, excluding the fraction of rRNAs and tRNAs that is removed prior to sequencing) in the cell. For simplicity, a  $T_{all} = 10^6$  was used here (the number is not well constrained by existing data); note that an increase in  $T_{all}$  is effectively equivalent to a decrease in  $C_c$ .

### References

1. Trapnell C, Williams BA, Pertea G, Mortazavi A, et al. 2010. Transcript assembly and quantification by

RNA-Seq reveals unannotated transcripts and isoform switching during cell differentiation. *Nat Biotechnol* **28**(5):511–515.
